# Supplementary material for: High-efficient inhibition of recognition in allorejection via a pMyD88/liposomes complex
Source: Royal Society of Chemistry journal article supplement (doi:10.1039/c4ra12979b), 2015-01-01
Supplement: c4ra12979b1.pdf [file c4ra12979b1.pdf]

# High-efficient inhibition of recognition in allorejection via pMyD88/liposomes complex

Tao Yu<sup>a‡</sup>, Lin Su<sup>b‡</sup>, Shuangnan Zhang<sup>b</sup>, Hanjie Wang<sup>b</sup>, Sheng Wang<sup>b</sup>, Xue Li<sup>b</sup>, Jin Chang<sup>b\*</sup> and Gang Liu<sup>c\*</sup>

<sup>a</sup> *Department of Oncology, Tianjin Medical University General Hospital, 154 Anshan Road, Heping District, Tianjin 300052, P.R.China*

<sup>b</sup> *Institute of Nanobiotechnology, School of Materials Science and Engineering, Tianjin University and Tianjin Key Laboratory of Composites and Functional Materials, Tianjin 300072, P.R. China*

<sup>c</sup> *Department of General Surgery, Tianjin Medical University General Hospital, 154 Anshan Road, Heping District, Tianjin 300052, P.R.China*

---

<sup>‡</sup> Both authors contributed equally to this work.

\* Corresponding authors.

E-mail addresses: jinchang@tju.edu.cn (Jin Chang), lg1059@sina.com (Gang Liu).

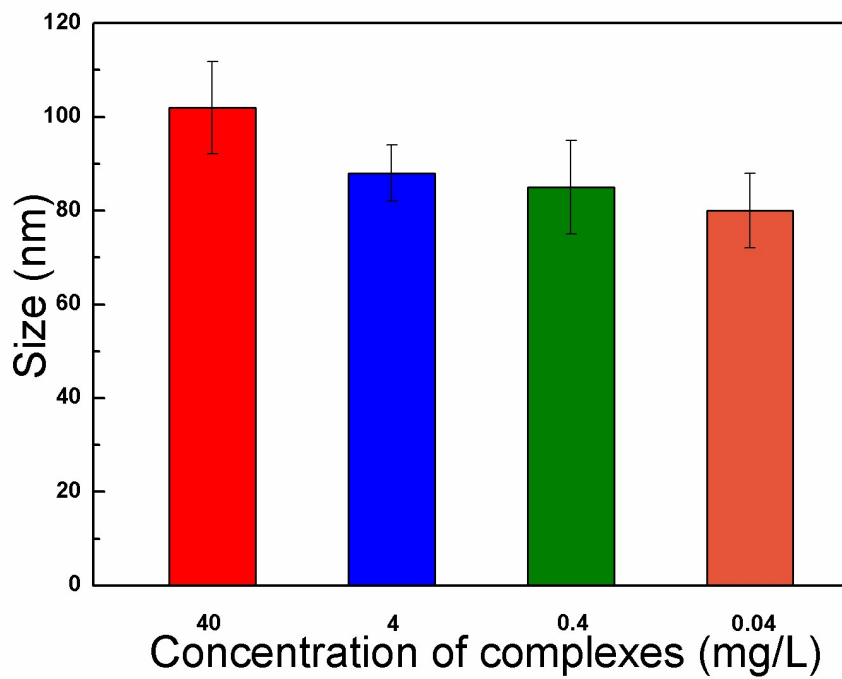

Fig. S1 Stability of the pMyD88/liposomes complexes against dilution.

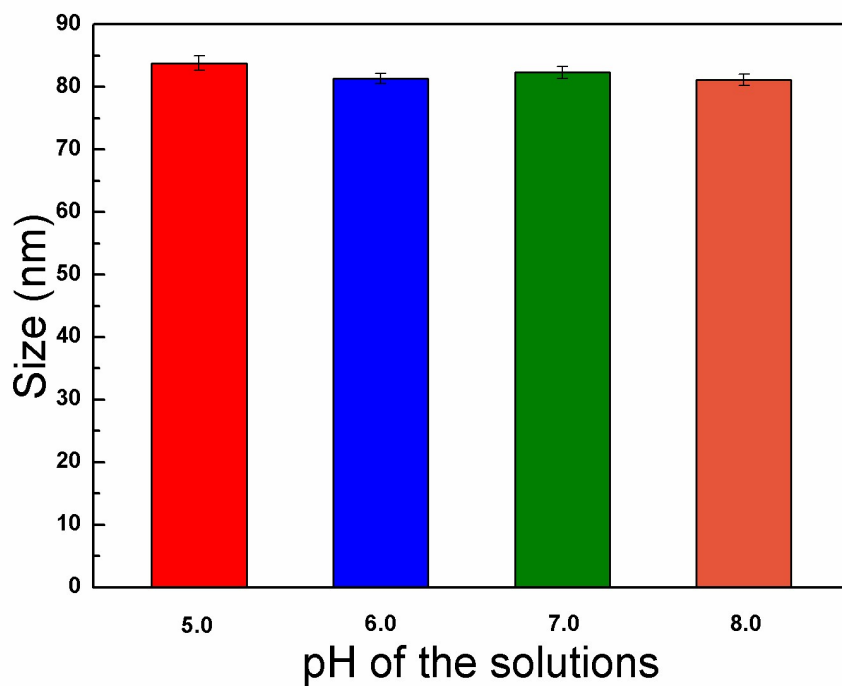

Fig. S2 Stability of the pMyD88/liposomes complexes against pH change.

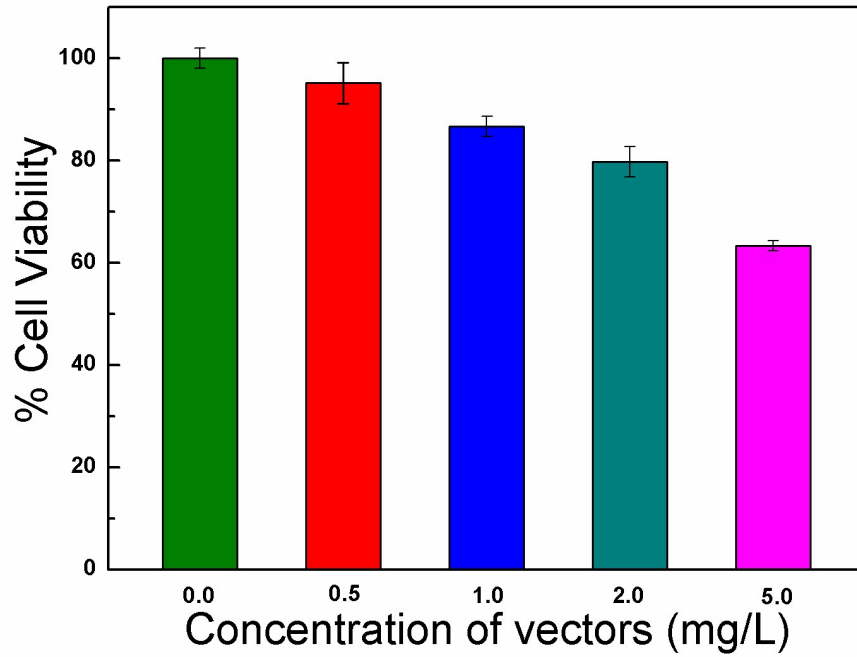

Fig. S3 Cell viability of the vectors with different concentrations.

| Groups        | $\Delta Ct$ | $\Delta\Delta Ct$ | $2^{-\Delta\Delta Ct}$ | Transcription       | F     | P     |
|---------------|-------------|-------------------|------------------------|---------------------|-------|-------|
|               |             |                   |                        | level of MyD88 mRNA |       |       |
| Blank         | 7.6000,     | -0.291,           | 1.22,                  | 1.09±0.18           | 19.09 | 0.000 |
|               | 7.828,      | -0.063,           | 1.04,                  |                     |       |       |
|               | 7.513,      | -0.378,           | 1.30,                  |                     |       |       |
|               | 7.929,      | 0.038,            | 0.97,                  |                     |       |       |
|               | 7.637,      | 0.254,            | 1.19,                  |                     |       |       |
|               | 8.197,      | 0.306,            | 0.81,                  |                     |       |       |
| Liposomes     | 7.522,      | -0.043,           | 1.03,                  | 1.01±0.12           | 19.09 | 0.000 |
|               | 7.351,      | -0.214,           | 1.16,                  |                     |       |       |
|               | 7.717,      | 0.152,            | 0.90,                  |                     |       |       |
|               | 7.783,      | 0.218,            | 0.86,                  |                     |       |       |
| pHK/liposomes | 7.415,      | 0.150,            | 1.11,                  | 1.03±0.16           | 19.09 | 0.000 |
|               | 7.536,      | 0.029,            | 1.02,                  |                     |       |       |
|               | 7.115,      | -0.299,           | 1.23,                  |                     |       |       |
|               | 7.126,      | -0.288,           | 0.82,                  |                     |       |       |
|               | 7.568,      | 0.154,            | 0.90,                  |                     |       |       |

|                  |         |        |       |            |
|------------------|---------|--------|-------|------------|
|                  | 7.200,  | 0.214, | 1.16, |            |
|                  | 7.414,  | 0.000, | 1.00, |            |
|                  | 7.303.  | 0.113. | 1.08. |            |
|                  | 11.763, | 3.645, | 0.08, |            |
|                  | 10.677, | 2.559, | 0.17, |            |
| pMyD88/liposomes | 11.596, | 3.478, | 0.09, | 0.11±0.04* |
|                  | 10.959, | 2.841, | 0.14, |            |
|                  | 11.309, | 3.191, | 0.11, |            |
|                  | 11.755. | 3.637. | 0.08. |            |

**Table S1** Transcription level of MyD88 mRNA analyzed by Real Time PCR ( $\bar{x} \pm s$ , n=6)

| Groups           | Each group                                | Expression level of MyD88 protein | F      | P     |
|------------------|-------------------------------------------|-----------------------------------|--------|-------|
| Blank            | 0.92, 0.99,<br>1.05, 1.11,<br>1.03, 0.80. | 0.98±0.11                         |        |       |
| Liposomes        | 0.95, 0.86,<br>1.04, 1.07,<br>0.96, 0.84. | 0.95±0.09                         | 173.58 | 0.000 |
| pHK/liposomes    | 0.98, 0.92,<br>0.91, 0.89,<br>1.01, 0.94. | 0.94±0.05                         |        |       |
| pMyD88/liposomes | 0.08, 0.20,<br>0.12, 0.07,<br>0.11, 0.09. | 0.11±0.05*                        |        |       |

**Table S2** Expression level of MyD88 protein analyzed by western blot ( $\bar{x} \pm s$ , n=6).
